# Supplementary material for: Single-cell RNA sequencing highlights the functional role of human endogenous retroviruses in gallbladder cancer
Source: PubMed Central journal article supplement — eBioMedicine. 2022 Oct 29;85:104319. doi: 10.1016/j.ebiom.2022.104319 (PMC9626538; doi:10.1016/j.ebiom.2022.104319), 2022-10-29
Supplement: mmc3.pdf [file mmc3.pdf]

## **Supplementary File 2**

**Single-cell RNA sequencing highlights the functional role of  
human endogenous retroviruses in gallbladder cancer**

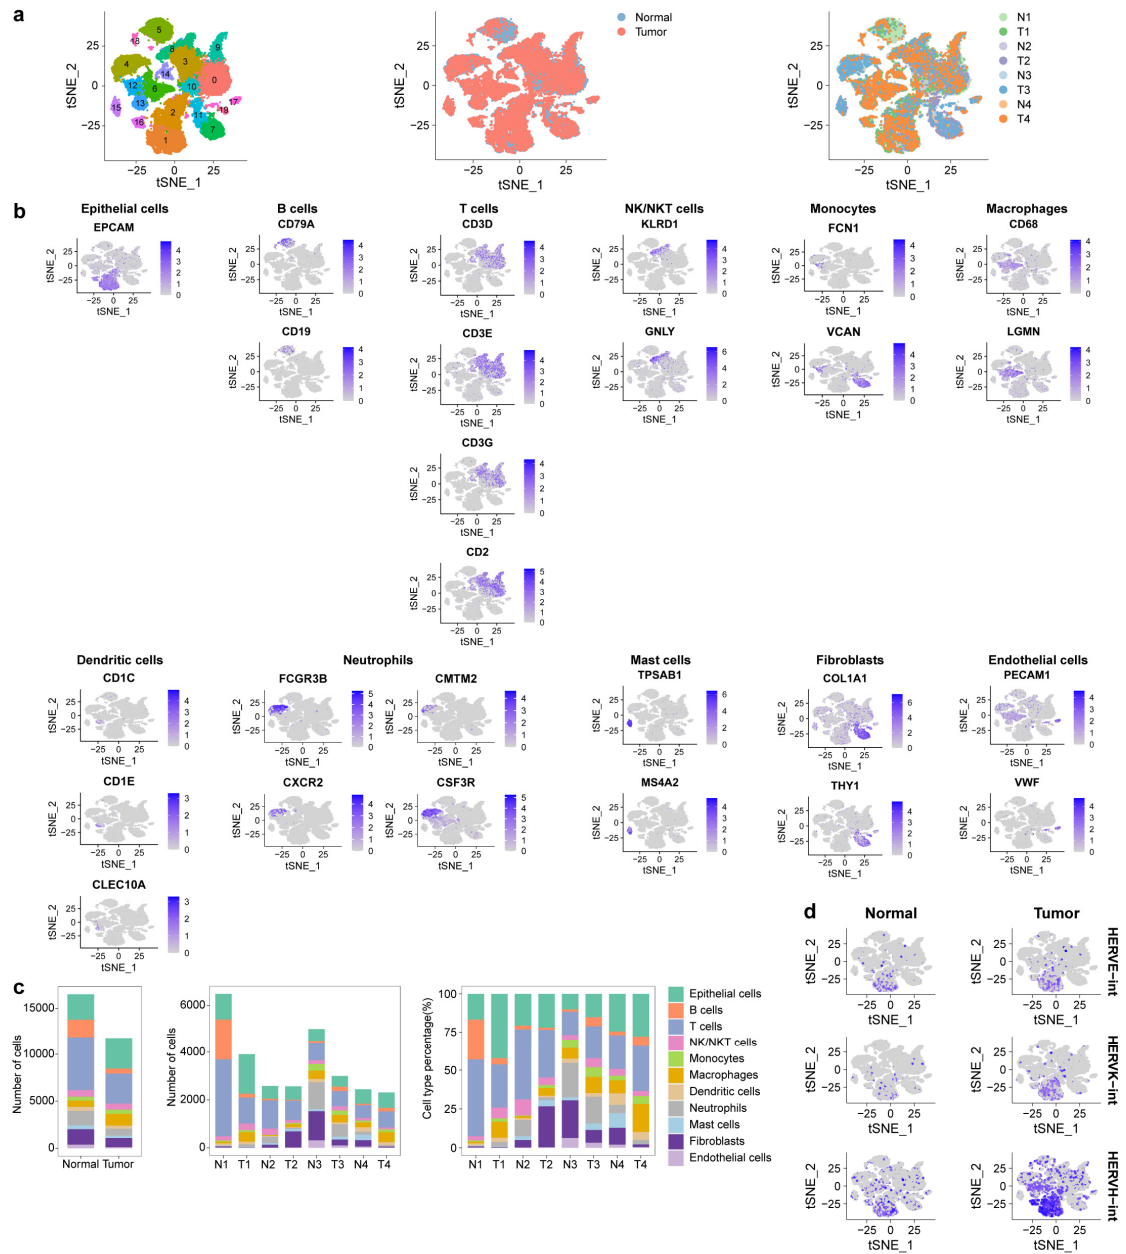

**Supplementary Figure 1. Major cell type identification in GBC and adjacent normal tissues.**

**a** tSNE projection of 28,301 single cells from tumor and adjacent normal tissues, color-coded by clusters (left), tissues (middle), and samples (right).

**b** tSNE plot displaying the expression of canonical marker genes for major cell types.

**c** Cell number (left, middle) and relative proportion (right) of major cell types in different tissue types and samples.

**d** tSNE plot displaying the expression of HERV families in tumor and adjacent normal tissues.

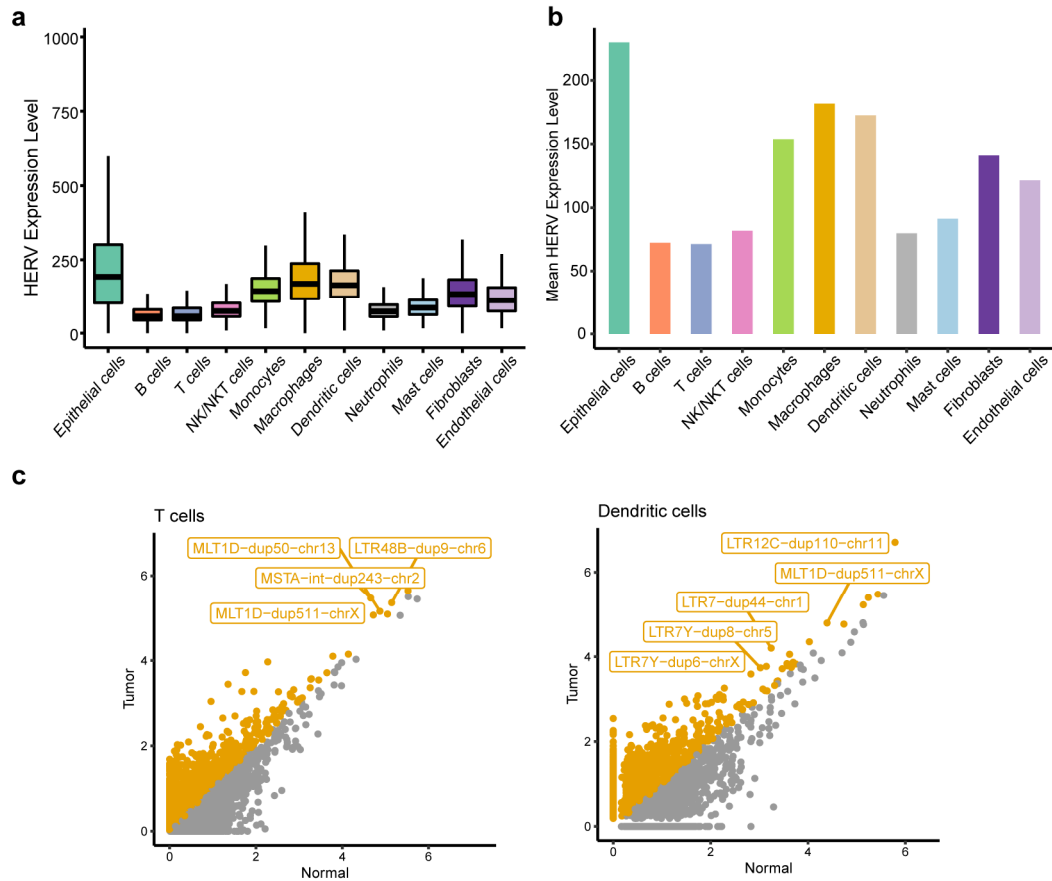

**Supplementary Figure 2. Experimental verification of HERV-derived enhancer activity.**

**a** Overall expression levels of HERVs in major cell types.

**b** Mean HERV expression level across all cells for a given cell type.

**c** Significantly upregulated HERV loci identified in GBC-derived T cells (left) and DCs (right).

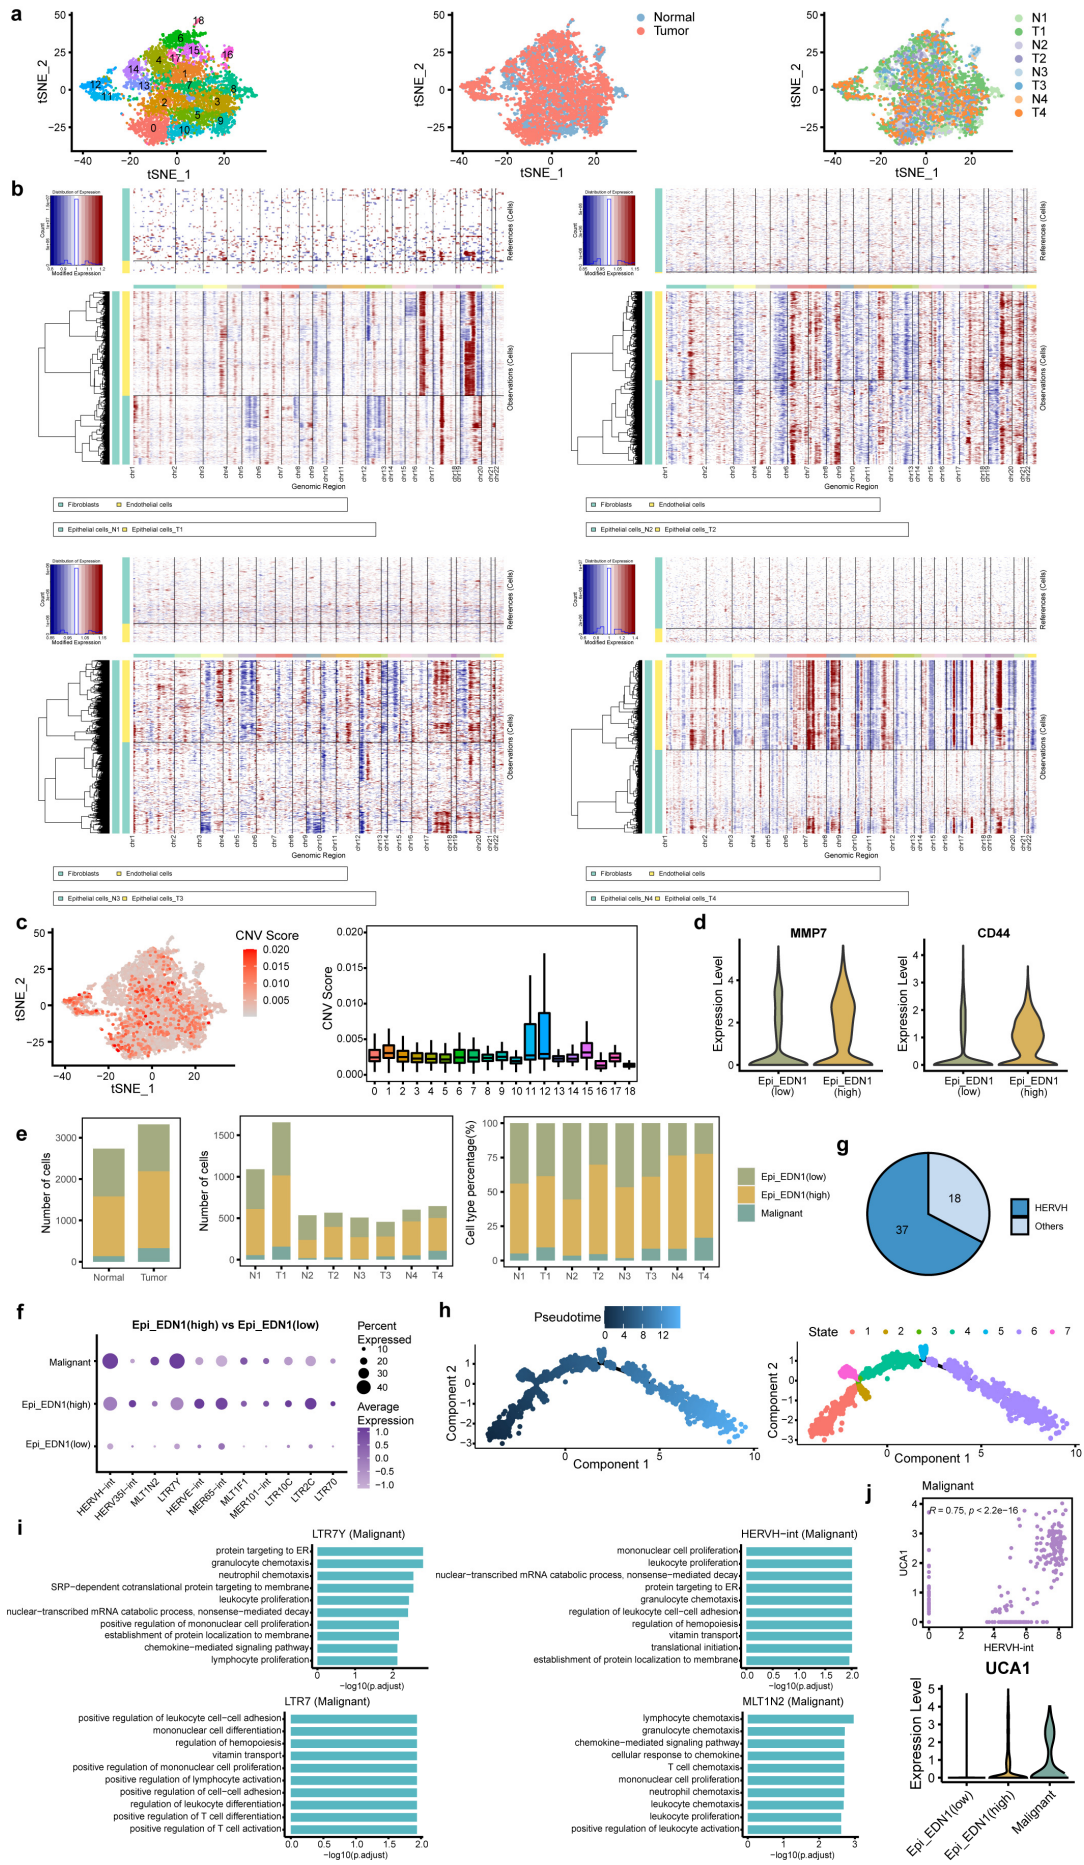

**Supplementary Figure 3. Epithelial cell subtypes.**

**a** tSNE projection of epithelial cells, color-coded by clusters (left), tissues (middle), and samples (right).

**b** Heatmap showing large-scale CNVs for each pair of samples.

**c** tSNE plot displaying the CNV score for epithelial cells (left) and boxplot showing the CNV score for epithelial cell clusters (right).

**d** Violin plot displaying the expression of selected genes in two non-malignant subtypes.

**e** Cell number (left, middle) and relative proportion (right) of epithelial cell subtypes in different tissue types and samples.

**f** HERV families upregulated in Epi\_EDN1(high) cells compared to Epi\_EDN1(low) cells.

**g** Pie chart displaying the percentage of the upregulated HERVH loci.

**h** Differentiation trajectory of malignant and normal epithelial cells inferred by Monocle2, color-coded by pseudotime (left) and states (right).

**i** Top 10 GO terms for genes correlated with upregulated HERV families.

**j** Scatter plot showing correlation between the indicated gene and HERV (top) and expression of this gene depicted in violin plot (bottom).

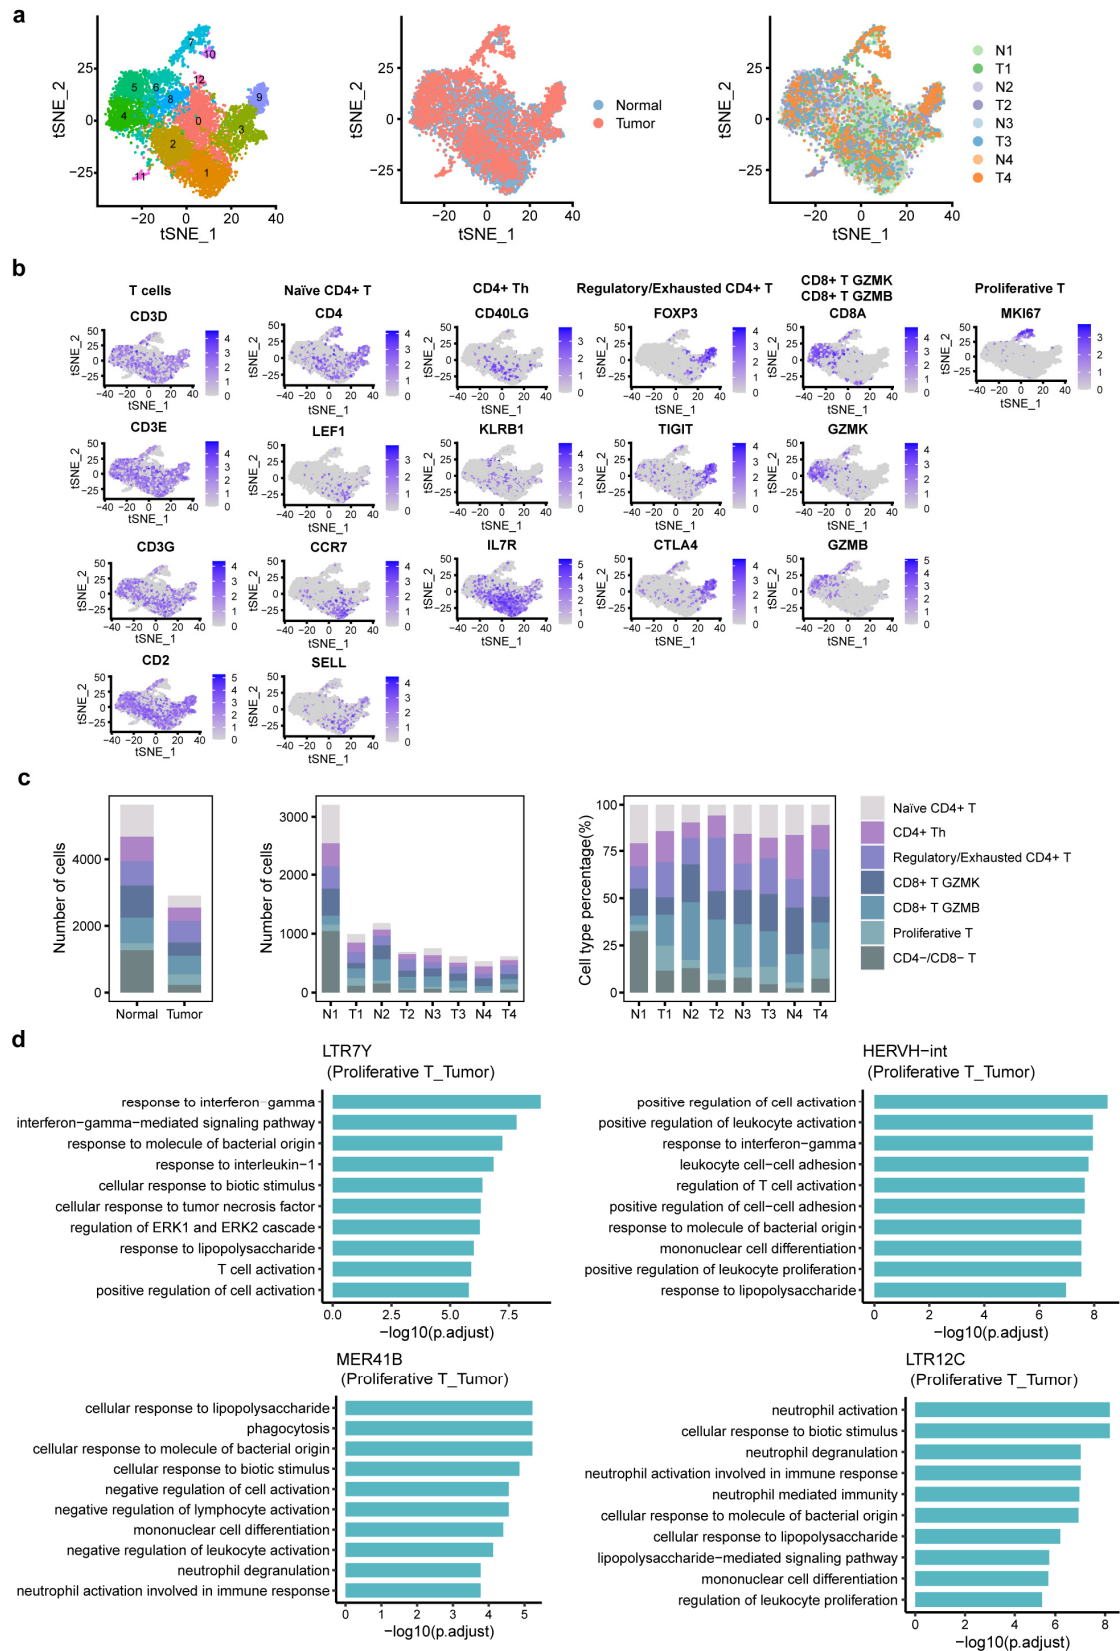

### Supplementary Figure 4. T cell subtypes.

**a** tSNE projection of T cells, color-coded by clusters (left), tissues (middle), and samples (right).

**b** tSNE plot displaying the expression of canonical marker genes for T cell subtypes. Clusters (cluster 10,11 and 12) that did not express T cell marker genes (CD3D, CD3E, CD3G and CD2) were excluded from downstream analyses due to ambiguity in their identity. Cluster 0 expressed T cell gene markers but hardly expressed CD4 and CD8A and was thought to represent CD4-/CD8- T cells.

**c** Cell number (left, middle) and relative proportion (right) of T cell subtypes in different tissue types and samples.

**d** Top 10 GO terms for genes correlated with upregulated HERV families.

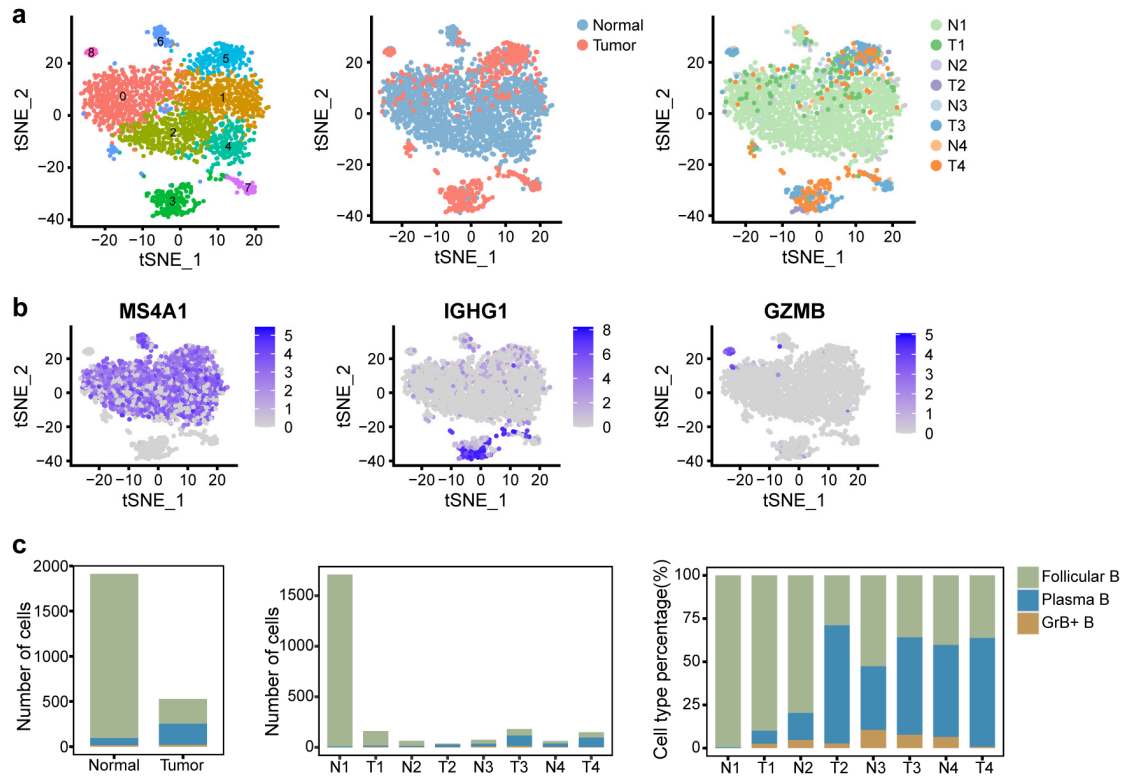

**Supplementary Figure 5. B cell subtypes.**

**a** tSNE projection of B cells, color-coded by clusters (left), tissues (middle), and samples (right).

**b** tSNE plot displaying the expression of canonical marker genes for B cell subtypes.

**c** Cell number (left, middle) and relative proportion (right) of B cell subtypes in different tissue types and samples.



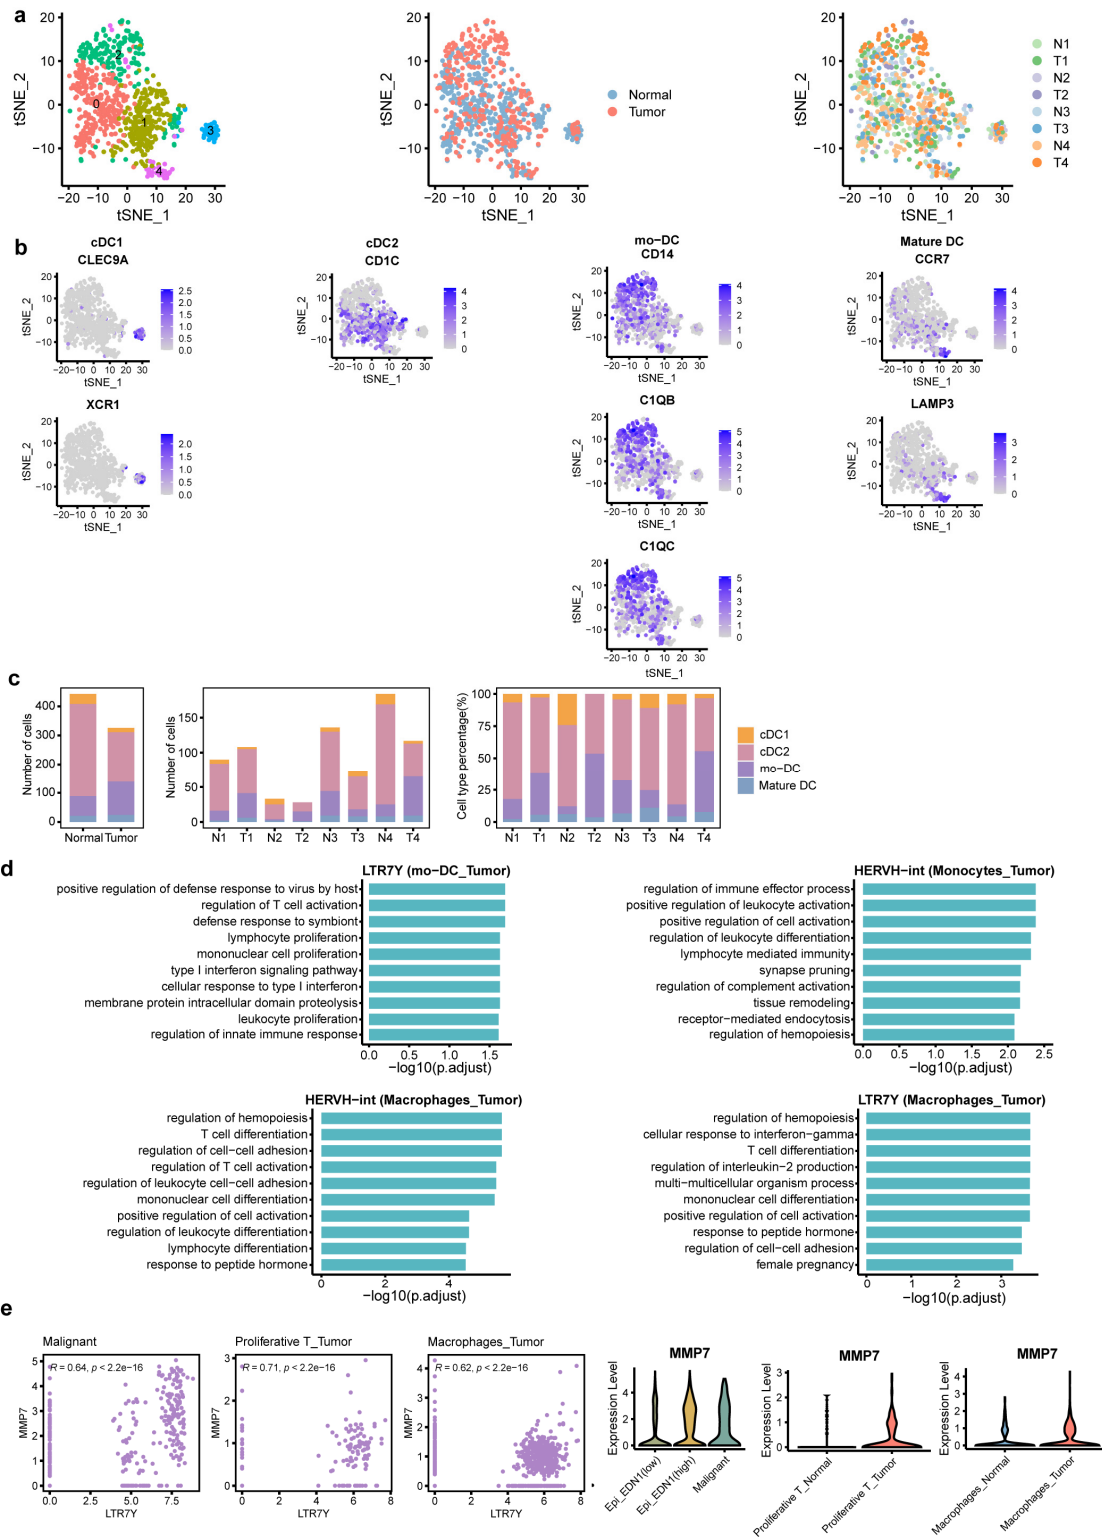

### Supplementary Figure 6. Myeloid cell subtypes.

**a** tSNE projection of DCs, color-coded by clusters (left), tissues (middle), and samples (right).

**b** tSNE plot displaying the expression of canonical marker genes for DC subtypes.

**c** Cell number (left, middle) and relative proportion (right) of DC subtypes in different tissue types and samples.

**d** Top 10 GO terms for genes correlated with upregulated HERV families.

**e** Scatter plot showing correlation between gene MMP7 and HERV LTR7Y in the indicated cell populations (left) and expression of gene MMP7 depicted in violin plot (right).

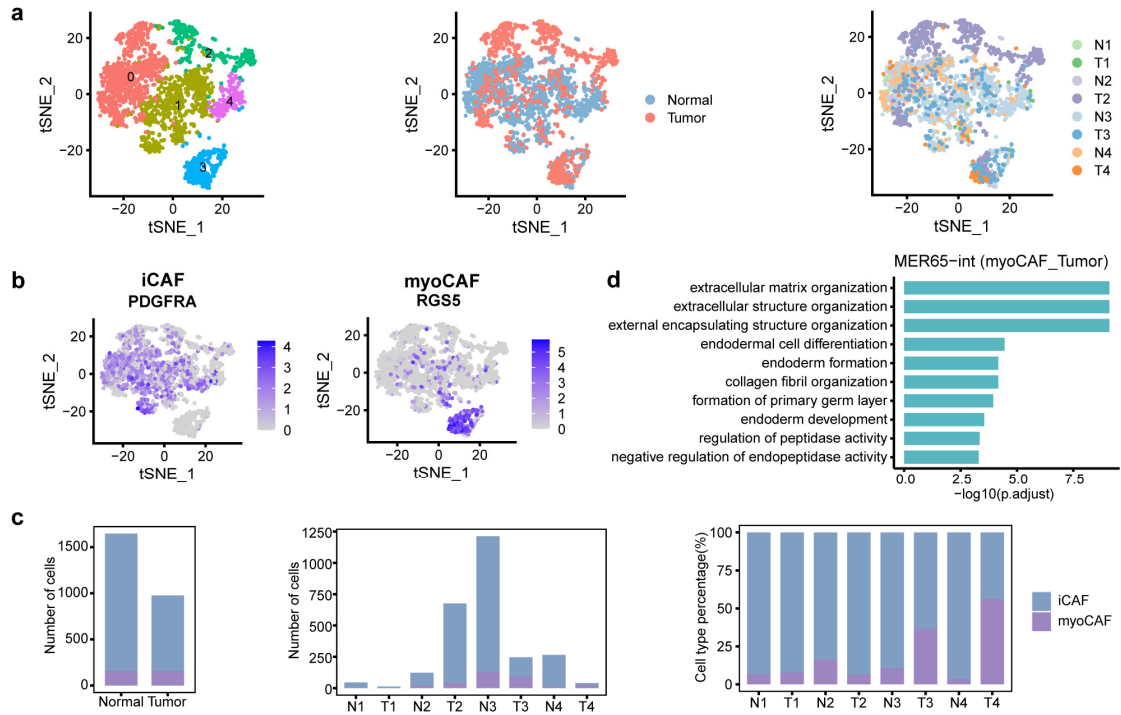

### Supplementary Figure 7. Fibroblast subtypes.

**a** tSNE projection of fibroblasts, color-coded by clusters (left), tissues (middle), and samples (right).

**b** tSNE plot displaying the expression of canonical marker genes for fibroblast subtypes.

**c** Cell number (left, middle) and relative proportion (right) of fibroblast subtypes in different tissue types and samples.

**d** Top 10 GO terms for genes correlated with upregulated MER65-int.

**Supplementary Table 1. QC metrics used to select cells.**

| <b>sample</b> | <b>nfeature.min</b> | <b>nfeature.max</b> | <b>mitochondrial contamination</b> |
|---------------|---------------------|---------------------|------------------------------------|
| N1            | 200                 | 5000                | 30%                                |
| T1            | 200                 | 6000                | 30%                                |
| N2            | 200                 | 6000                | 30%                                |
| T2            | 200                 | 6000                | 30%                                |
| N3            | 200                 | 5000                | 30%                                |
| T3            | 200                 | 6000                | 30%                                |
| N4            | 200                 | 8000                | 30%                                |
| T4            | 200                 | 8000                | 30%                                |

**Supplementary Table 2. Clinical information and single-cell RNA sequencing data.**

| <b>Patient name</b> | <b>Sample name</b> | <b>Gender</b> | <b>Age (year)</b> | <b>Tumor subtype</b> | <b>Sample collection</b> | <b>Number of cells</b> | <b>Total filtered reads</b> | <b>Reads mapped ambiguously (%) (gene   HERV)</b> |
|---------------------|--------------------|---------------|-------------------|----------------------|--------------------------|------------------------|-----------------------------|---------------------------------------------------|
| P1                  | N1                 | female        | 64                | adenocarcinoma       | adjacent normal tissue   | 6,491                  | 265,093,671                 | 2.29   6.07                                       |
| P1                  | T1                 | female        | 64                | adenocarcinoma       | tumor tissue             | 3,908                  | 289,106,850                 | 2.14   5.61                                       |
| P2                  | N2                 | male          | 56                | adenocarcinoma       | adjacent normal tissue   | 2,581                  | 667,559,625                 | 2.33   6.94                                       |
| P2                  | T2                 | male          | 56                | adenocarcinoma       | tumor tissue             | 2,568                  | 651,349,051                 | 2.53   6.48                                       |
| P3                  | N3                 | female        | 72                | adenocarcinoma       | adjacent normal tissue   | 5,000                  | 465,915,248                 | 2.39   6.52                                       |
| P3                  | T3                 | female        | 72                | adenocarcinoma       | tumor tissue             | 2,999                  | 608,028,773                 | 2.67   7.17                                       |
| P4                  | N4                 | male          | 54                | adenocarcinoma       | adjacent normal tissue   | 2,445                  | 419,464,683                 | 3.2   6.62                                        |
| P4                  | T4                 | male          | 54                | adenocarcinoma       | tumor tissue             | 2,309                  | 441,603,902                 | 3.35   7.45                                       |

**Supplementary Table 3. Primer sequences for nested PCR.**

| <b>Primer Name</b>       | <b>Primer sequence</b>                          |
|--------------------------|-------------------------------------------------|
| MER4A1-dup6-chr1-1-F     | 5'- TTCAGGATACCTGAGCCCCCTGTG -3'                |
| MER4A1-dup6-chr1-1-R     | 5'- TGCCCACAGGTCTTGGGTTATCATG -3'               |
| MER4A1-dup6-chr1-2-F     | 5'- CATTCTCTATCGATAGGTACTGTGAACCAAAAATATC -3'   |
| MER4A1-dup6-chr1-2-R     | 5'- GCACGCGTAAGAGCTCGGTACCTGCCTACCTCTCTCAC -3'  |
| MER11B-dup23-chr5-1-F    | 5'- TAAGAGGTGTAGTCTTGGTAGGAAGATGC -3'           |
| MER11B-dup23-chr5-1-R    | 5'- AAGACCATTGGCCACATAGCCTAG -3'                |
| MER11B-dup23-chr5-2-F    | 5'- CATTCTCTATCGATAGGTACAGACCATGGATTATT -3'     |
| MER11B-dup23-chr5-2-R    | 5'- GCACGCGTAAGAGCTCGGTACTGTTGCGGGAAGTCAC -3'   |
| LTR13A-dup8-chr11-1-F    | 5'- CTCCACCTCCCAGATTCAAGCGATTC -3'              |
| LTR13A-dup8-chr11-1-R    | 5'- TTCTGCATAGACACAGTAACAGTCTGATCTCG -3'        |
| LTR13A-dup8-chr11-2-F    | 5'- CATTCTCTATCGATAGGTACTGTAGGGTCCAGC -3'       |
| LTR13A-dup8-chr11-2-R    | 5'- GCACGCGTAAGAGCTCGGTACTGTGGCGGAGGAAT -3'     |
| LTR33-dup38-chr16-1-F    | 5'- TGACCTCAAGTGATCCTCCTGCCTTG -3'              |
| LTR33-dup38-chr16-1-R    | 5'- GCGCTTCTGAAGTTTGCTAACTTATGAATGCAAC -3'      |
| LTR33-dup38-chr16-2-F    | 5'- CATTCTCTATCGATAGGTACTATTCTCCATTGGTC -3'     |
| LTR33-dup38-chr16-2-R    | 5'- GCACGCGTAAGAGCTCGGTACGGGAGACCTTGTCTC -3'    |
| MLT1F-int-dup5-chr16-1-F | 5'- TCTCTGCAAGGTAAGCCCTTCTCTAC -3'              |
| MLT1F-int-dup5-chr16-1-R | 5'- GGTGAGAAAGTCTGTTAATAAGAGTCCAGTG -3'         |
| MLT1F-int-dup5-chr16-2-F | 5'- CATTCTCTATCGATAGGTACTCTCTGCAAGGTAAG -3'     |
| MLT1F-int-dup5-chr16-2-R | 5'- CATTCTCTATCGATAGGTACTCTCTGCAAGGTAAG -3'     |
| LTR2-dup7-chr16-1-F      | 5'- CTCTAGCCTGGGCAACAGAGCAAGACTC -3'            |
| LTR2-dup7-chr16-1-R      | 5'- ACATTCCCTGGAGCCTGGCATCTTGAC -3'             |
| LTR2-dup7-chr16-2-F      | 5'- CATTCTCTATCGATAGGTACGTAGCAGGACGAG -3'       |
| LTR2-dup7-chr16-2-R      | 5'- CACGCGTAAGAGCTCGGTACTAAGGAGGAGACCA -3'      |
| LTR10C-dup13-chr19-1-F   | 5'- GTAAAAAGAAAAGTAGAGGTTCTTCTCAAAGACTTC -3'    |
| LTR10C-dup13-chr19-1-R   | 5'- CAAAGACTTCCTTCTTCATCTAATTAAGAATAAATAG -3'   |
| LTR10C-dup13-chr19-2-F   | 5'- CATTCTCTATCGATAGGTACGTAAAAAGAAAAGTAGAG -3'  |
| LTR10C-dup13-chr19-2-R   | 5'- GCACGCGTAAGAGCTCGGTACCTATTTATTCTTAATTAG -3' |
| MSTD-dup87-chr20-1-F     | 5'- GCAGGAAGTATTATCCAGCAAGTTACTACTGTG -3'       |
| MSTD-dup87-chr20-1-R     | 5'- TGTCAGACAATGACTGACAGAAGTTGGTAG -3'          |
| MSTD-dup87-chr20-2-F     | 5'- CATTCTCTATCGATAGGTACGTTTTAGTCTATTTGT -3'    |
| MSTD-dup87-chr20-2-R     | 5'- GCACGCGTAAGAGCTCGGTACTGCTATGGTTTTGAATGT -3' |

**Supplementary Table 4. HERVs with enhancer activity and their neighboring DEGs.**

| <b>HERV with enhancer activity</b> | <b>Location</b>           | <b>Neighboring DEGs</b>                                                     |
|------------------------------------|---------------------------|-----------------------------------------------------------------------------|
| MER4A1--dup6-chr1                  | chr1: 22982843-22983338   | C1QA, C1QB, KDM1A                                                           |
| MER11B-dup23-chr5                  | chr5: 151729381-151730458 | ATOX1, G3BP1                                                                |
| LTR13A-dup8-chr11                  | chr11: 65521819-65522784  | NEAT1                                                                       |
| LTR33-dup38-chr16                  | chr16: 18936807-18937237  | ARL6IP1                                                                     |
| MLT1F-int-dup5-chr16               | chr16: 29915600-29916253  | ASPHD1, INO80E, KCTD13, MVP, TAOK2, T<br>MEM219, YPEL3                      |
| LTR2-dup7-chr16                    | chr16: 30541069-30541510  | CD2BP2, DCTPP1, FBRS, ORAI3, PRR14, RNF<br>40, SEPHS2, STX4, ZNF688, ZNF689 |
| LTR10C-dup13-chr19                 | chr19: 15837284-15837348  | UCA1                                                                        |
| MSTD-dup87-chr20                   | chr20: 49769262-49769601  | B4GALT5, RNF114                                                             |
